# Supplementary material for: YGR198w (YPP1) targets A30P α-synuclein to the vacuole for degradation
Source: PubMed Central journal article supplement — J Cell Biol. 2007 Jun 18;177(6):1091–104. doi: 10.1083/jcb.200610071 (PMC2064368; doi:10.1083/jcb.200610071), 2007-06-18
Supplement: jcellbiol_jcb.200610071_3.pdf [file jcellbiol_jcb.200610071_3.pdf]

|              | (+A30P/+ YPP1) |          |             |                     | (-A30P/+ YPP1) |      |  | (-A30P/- YPP1) |      |
|--------------|----------------|----------|-------------|---------------------|----------------|------|--|----------------|------|
| Gene         | Mean           | SD       | P value     | P value (corrected) | Mean           | SD   |  | Mean           | SD   |
| akl1         | 31997.67       | 2165.08  | 0.00089772  | P ≥ 0.05            |                |      |  |                |      |
| akr1         | 25385.83       | 1373.58  | 0.057738964 | P ≥ 0.05            |                |      |  |                |      |
| akr2         | 29917.33       | 4938.23  | 0.541024449 | P ≥ 0.05            |                |      |  |                |      |
| ape1         | 30689.17       | 24485.58 | 0.314996801 | P ≥ 0.05            |                |      |  |                |      |
| apl5         | 18810.50       | 5767.13  | 0.471985724 | P ≥ 0.05            |                |      |  |                |      |
| atg1         | 31421.00       | 17770.69 | 0.097870536 | P ≥ 0.05            |                |      |  |                |      |
| atg11        | 15732.00       | 6198.65  | 0.493412219 | P ≥ 0.05            |                |      |  |                |      |
| atg14        | 29478.83       | 4133.62  | 0.56103962  | P ≥ 0.05            |                |      |  |                |      |
| atg15        | 25488.00       | 4005.59  | 0.643069687 | P ≥ 0.05            |                |      |  |                |      |
| atg16        | 26489.17       | 2563.33  | 0.985936643 | P ≥ 0.05            |                |      |  |                |      |
| atg19        | 37697.00       | 6863.31  | 0.158693938 | P ≥ 0.05            |                |      |  |                |      |
| atg20        | 27235.50       | 4118.75  | 0.546853962 | P ≥ 0.05            |                |      |  |                |      |
| atg23        | 20153.17       | 4361.15  | 0.026246185 | P ≥ 0.05            |                |      |  |                |      |
| atg7         | 19777.67       | 2300.90  | 0.006811498 | P ≥ 0.05            |                |      |  |                |      |
| atg8         | 29537.50       | 911.18   | 0.008163669 | P ≥ 0.05            |                |      |  |                |      |
| atg9         | 29068.17       | 2827.16  | 0.757598231 | P ≥ 0.05            |                |      |  |                |      |
| bro1(vps31)  | 45269.83       | 8873.86  | 0.002842662 | P ≥ 0.05            |                |      |  |                |      |
| ccz1         | 352960.33      | 17543.95 | 3.31629E-07 | P < 0.001           | 45082          | 7462 |  | 32089          | 1202 |
| chc1         | 31530.67       | 2851.23  | 0.006297961 | P ≥ 0.05            |                |      |  |                |      |
| cpr1         | 29931.67       | 2373.66  | 0.614798009 | P ≥ 0.05            |                |      |  |                |      |
| did2(vps46)  | 101702.56      | 4612.48  | 1.83141E-18 | P < 0.001           | 28249          | 1251 |  | 28094          | 2824 |
| end3         | 247586.89      | 10570.94 | 2.25079E-12 | P < 0.001           | 32359          | 1966 |  | 26026          | 3092 |
| fmp45        | 28266.00       | 3690.63  | 0.936889418 | P ≥ 0.05            |                |      |  |                |      |
| fth1         | 34703.17       | 4643.33  | 0.285186045 | P ≥ 0.05            |                |      |  |                |      |
| inp51        | 26098.17       | 2295.98  | 0.696177522 | P ≥ 0.05            |                |      |  |                |      |
| inp52        | 25993.33       | 1499.51  | 0.405551567 | P ≥ 0.05            |                |      |  |                |      |
| jji1         | 23068.33       | 1319.56  | 0.00453237  | P ≥ 0.05            |                |      |  |                |      |
| mon1         | 410979.92      | 82424.84 | 3.99612E-09 | P < 0.001           | 41437          | 3499 |  | 27569          | 4013 |
| mon2         | 124287.83      | 46443.79 | 0.00068162  | P ≥ 0.05            |                |      |  |                |      |
| myo3         | 68904.00       | 2171.92  | 1.28006E-07 | P < 0.001           |                |      |  |                |      |
| myo5         | 67558.00       | 1716.52  | 1.37366E-07 | P < 0.001           |                |      |  |                |      |
| nhx1(Vps44)  | 17614.83       | 2846.57  | 0.004312023 | P ≥ 0.05            |                |      |  |                |      |
| pbi2         | 17587.33       | 1771.38  | 0.001416639 | P ≥ 0.05            |                |      |  |                |      |
| pep12(vps6)  | 24336.17       | 4924.15  | 0.00138387  | P ≥ 0.05            |                |      |  |                |      |
| pep3(vps18)  | 114383.50      | 14258.62 | 0.000344447 | P < 0.05            | 37442          | 8045 |  | 31410          | 4249 |
| pep4         | 108517.00      | 42072.76 | 0.011255494 | P ≥ 0.05            |                |      |  |                |      |
| pep5 (vps11) | 192719.58      | 66836.82 | 1.39489E-06 | P < 0.001           | 31719          | 2435 |  | 27934          | 5115 |
| pep8(vps26)  | 38561.17       | 1576.50  | 0.027636279 | P ≥ 0.05            |                |      |  |                |      |
| pil1         | 53432.50       | 2064.88  | 1.14887E-06 | P < 0.001           |                |      |  |                |      |
| pkh1         | 25185.00       | 1695.40  | 0.054541249 | P ≥ 0.05            |                |      |  |                |      |
| pkt2         | 25793.83       | 2099.68  | 0.414798962 | P ≥ 0.05            |                |      |  |                |      |
| rcy1         | 21650.33       | 4099.64  | 0.21908408  | P ≥ 0.05            |                |      |  |                |      |
| rvs161       | 129064.22      | 9819.33  | 4.63078E-10 | P < 0.001           | 24932          | 3987 |  | 26047          | 2966 |
| sds24        | 19482.83       | 2255.05  | 0.000170171 | P < 0.05            |                |      |  |                |      |
| she4         | 55115.67       | 1232.58  | 1.98546E-06 | P < 0.001           |                |      |  |                |      |
| siw14        | 118030.78      | 3141.99  | 2.80669E-12 | P < 0.001           | 30050          | 1436 |  | 22643          | 2142 |
| sla1         | 211748.89      | 5045.16  | 4.5156E-13  | P < 0.001           | 30253          | 2228 |  | 31320          | 4822 |
| sla2         | 282629.56      | 16050.33 | 1.82816E-11 | P < 0.001           | 32091          | 5153 |  | 32141          | 3372 |
| snc1         | 133057.22      | 16266.66 | 2.77989E-07 | P < 0.001           | 29828          | 2422 |  | 29160          | 6306 |

|              |           |          |             |           |       |      |       |      |  |
|--------------|-----------|----------|-------------|-----------|-------|------|-------|------|--|
| snf7(vps32)  | 10521.83  | 7113.00  | 0.240202878 | P ≥ 0.05  |       |      |       |      |  |
| snf8(vps22)  | 99609.67  | 14108.67 | 8.90825E-08 | P < 0.001 | 31187 | 3058 | 26121 | 4406 |  |
| snx4         | 28289.33  | 2599.42  | 0.19491377  | P ≥ 0.05  |       |      |       |      |  |
| ssa2         | 23659.67  | 1633.38  | 0.001231802 | P ≥ 0.05  |       |      |       |      |  |
| stp22(vps23) | 145530.44 | 11139.33 | 6.84732E-09 | P < 0.001 | 30008 | 1185 | 27207 | 3065 |  |
| sur7         | 30103.17  | 5457.74  | 0.785284306 | P ≥ 0.05  |       |      |       |      |  |
| swf1         | 112441.33 | 25864.96 | 0.000292762 | P < 0.05  | 39163 | 7841 | 30396 | 1914 |  |
| trx1         | 109641.33 | 9238.26  | 1.52087E-08 | P < 0.001 | 29179 | 2447 | 25894 | 2025 |  |
| vac14        | 27738.17  | 1109.55  | 0.916381399 | P ≥ 0.05  |       |      |       |      |  |
| vac8         | 19957.33  | 2605.06  | 0.001361577 | P ≥ 0.05  |       |      |       |      |  |
| vam3         | 72356.67  | 39860.02 | 0.005433047 | P ≥ 0.05  | 38022 | 3311 | 29916 | 2107 |  |
| vam7(vps43)  | 29748.50  | 1805.07  | 0.605228978 | P ≥ 0.05  |       |      |       |      |  |
| vid22        | 25067.83  | 1423.18  | 0.014247563 | P ≥ 0.05  |       |      |       |      |  |
| vid24        | 29766.83  | 6612.14  | 0.743826646 | P ≥ 0.05  |       |      |       |      |  |
| vid27        | 26371.50  | 699.12   | 0.024586606 | P ≥ 0.05  |       |      |       |      |  |
| vid28        | 24824.17  | 1092.36  | 0.004513984 | P ≥ 0.05  |       |      |       |      |  |
| vid30        | 28183.50  | 2589.81  | 0.158159786 | P ≥ 0.05  |       |      |       |      |  |
| vps1         | 186185.44 | 10686.10 | 6.30826E-11 | P < 0.001 | 28918 | 2029 | 23793 | 3747 |  |
| vps10        | 207963.78 | 2924.19  | 1.65485E-13 | P < 0.001 | 28067 | 2379 | 25999 | 2686 |  |
| vps13        | 18638.00  | 1988.16  | 0.000260729 | P < 0.05  |       |      |       |      |  |
| vps15        | 24392.83  | 2417.15  | 0.11094118  | P ≥ 0.05  |       |      |       |      |  |
| vps16        | 24456.83  | 3390.02  | 0.115963125 | P ≥ 0.05  |       |      |       |      |  |
| vps17        | 25172.50  | 870.05   | 0.072890208 | P ≥ 0.05  |       |      |       |      |  |
| vps19        | 243738.00 | 7695.16  | 2.97869E-07 | P < 0.001 |       |      |       |      |  |
| vps2         | 222786.22 | 4143.47  | 8.84539E-16 | P < 0.001 | 28153 | 6300 | 26750 | 3427 |  |
| vps20        | 242608.33 | 11511.48 | 1.07573E-10 | P < 0.001 | 24915 | 2588 | 30281 | 3066 |  |
| vps21        | 27588.83  | 7169.22  | 0.440144569 | P ≥ 0.05  |       |      |       |      |  |
| vps24        | 107311.78 | 4556.18  | 4.32111E-10 | P < 0.001 | 26038 | 3334 | 24947 | 3918 |  |
| vps25        | 233637.33 | 8233.97  | 6.25886E-11 | P < 0.001 | 28156 | 2685 | 24809 | 3246 |  |
| vps26        | 25702.83  | 1648.52  | 0.087291161 | P ≥ 0.05  |       |      |       |      |  |
| vps27        | 133870.44 | 2848.70  | 1.33939E-13 | P < 0.001 | 27835 | 3590 | 24019 | 729  |  |
| vps28        | 230098.22 | 13539.00 | 9.25944E-12 | P < 0.001 | 27157 | 1268 | 31297 | 5712 |  |
| vps29        | 46191.33  | 14585.27 | 0.005283153 | P ≥ 0.05  |       |      |       |      |  |
| vps3         | 205502.67 | 4861.75  | 3.13059E-13 | P < 0.001 | 26125 | 4341 | 25081 | 4470 |  |
| vps30        | 31433.83  | 2362.19  | 0.865988397 | P ≥ 0.05  |       |      |       |      |  |
| vps33        | 23026.17  | 1879.56  | 0.00272741  | P ≥ 0.05  |       |      |       |      |  |
| vps34        | 25863.50  | 1720.89  | 0.47872665  | P ≥ 0.05  |       |      |       |      |  |
| vps35        | 19804.67  | 3519.97  | 0.11161789  | P ≥ 0.05  |       |      |       |      |  |
| vps36        | 107736.11 | 3708.51  | 5.27118E-12 | P < 0.001 | 28764 | 926  | 26414 | 4267 |  |
| vps37        | 33548.50  | 2399.67  | 0.098519984 | P ≥ 0.05  |       |      |       |      |  |
| vps38        | 28556.17  | 2661.28  | 0.903049812 | P ≥ 0.05  |       |      |       |      |  |
| vps39        | 41074.83  | 4962.55  | 0.001077526 | P ≥ 0.05  |       |      |       |      |  |
| vps4         | 95578.60  | 15890.53 | 1.04E-08    | P < 0.001 | 36987 | 3173 | 30575 | 2471 |  |
| vps41        | 9942.67   | 3542.01  | 0.046940815 | P ≥ 0.05  |       |      |       |      |  |
| vps45        | 21263.33  | 1771.37  | 0.003510904 | P ≥ 0.05  |       |      |       |      |  |
| vps5         | 26637.83  | 5040.92  | 0.042313123 | P ≥ 0.05  |       |      |       |      |  |
| vps53        | 25446.50  | 1887.41  | 0.256554303 | P ≥ 0.05  |       |      |       |      |  |
| vps54        | 31068.33  | 2329.87  | 0.442099227 | P ≥ 0.05  |       |      |       |      |  |
| vps60        | 21914.00  | 1757.56  | 0.004092506 | P ≥ 0.05  |       |      |       |      |  |
| vps61        | 27152.83  | 2913.51  | 0.393366918 | P ≥ 0.05  |       |      |       |      |  |
| vps62        | 26821.83  | 3220.59  | 0.114236927 | P ≥ 0.05  |       |      |       |      |  |
| vps63        | 26801.00  | 3199.65  | 0.1495513   | P ≥ 0.05  |       |      |       |      |  |
| vps64        | 27694.67  | 2718.28  | 0.887951202 | P ≥ 0.05  |       |      |       |      |  |

|       |           |         |             |               |       |      |       |      |
|-------|-----------|---------|-------------|---------------|-------|------|-------|------|
| vps65 | 26619.75  | 2152.72 | 0.733955351 | $P \geq 0.05$ |       |      |       |      |
| vps66 | 29359.33  | 2774.44 | 0.879638437 | $P \geq 0.05$ |       |      |       |      |
| vps68 | 24709.17  | 2408.26 | 0.146022654 | $P \geq 0.05$ |       |      |       |      |
| vps69 | 23691.00  | 4151.32 | 0.050566316 | $P \geq 0.05$ |       |      |       |      |
| vps71 | 26189.25  | 3061.40 | 0.586644192 | $P \geq 0.05$ |       |      |       |      |
| vps72 | 30822.83  | 2178.32 | 0.269582068 | $P \geq 0.05$ |       |      |       |      |
| vps73 | 22951.67  | 1258.56 | 0.001401954 | $P \geq 0.05$ |       |      |       |      |
| vps74 | 33432.50  | 6549.08 | 0.561482067 | $P \geq 0.05$ |       |      |       |      |
| vps75 | 29403.00  | 2575.09 | 0.330641999 | $P \geq 0.05$ |       |      |       |      |
| vps8  | 32007.50  | 5318.26 | 0.787845611 | $P \geq 0.05$ |       |      |       |      |
| vta1  | 122819.89 | 2451.82 | 6.33652E-13 | $P < 0.001$   | 31229 | 1825 | 26826 | 2909 |
| vtc1  | 143641.78 | 5241.97 | 4.21534E-11 | $P < 0.001$   | 27854 | 2295 | 26065 | 5163 |
| ypk1  | 26966.50  | 2610.23 | 0.772005325 | $P \geq 0.05$ |       |      |       |      |
| ypt53 | 59832.33  | 1855.67 | 3.83175E-08 | $P < 0.001$   |       |      |       |      |
|       |           |         |             |               |       |      |       |      |
| S288c | 25818.00  | 7005.00 |             |               | 29579 | 4056 | 22951 | 4792 |
